# Supplementary material for: Revised estimates of ocean-atmosphere CO2 flux are consistent with ocean carbon inventory
Source: Nat Commun. 2020 Sep 4;11:4422. doi: 10.1038/s41467-020-18203-3 (PMC7474059; doi:10.1038/s41467-020-18203-3)
Supplement: Supplementary file 3 — Supplementary Data [file 41467_2020_18203_MOESM3_ESM.xlsx]

## Sheet:  Figure 1
		Watson et al, "Revised estimates of ocean-atmosphere CO2 flux are consistent with ocean carbon inventory", in press, Nature Comms.
							Global ocean-atmosphere CO2 fluxes, PgC yr-1, effect of temperature corrections
						time	flux corrected for cool salty skin	f_CO2 corrected for subskin	Uncorrected
						1992.5	-2.26685	-1.94672	-1.72903
						1993.5	-2.12588	-1.79986	-1.53339
						1994.5	-1.9205	-1.59558	-1.28955
						1995.5	-1.86316	-1.53599	-1.10665
						1996.5	-1.79499	-1.46508	-1.02047
						1997.5	-2.04172	-1.70839	-1.21003
						1998.5	-1.99704	-1.65016	-1.15935
						1999.5	-1.7212	-1.37524	-0.882885
						2000.5	-1.76612	-1.41722	-0.896994
						2001.5	-1.64022	-1.29308	-0.826284
						2002.5	-1.92452	-1.57267	-1.09027
						2003.5	-2.00708	-1.65279	-1.22239
						2004.5	-2.11014	-1.75077	-1.29058
						2005.5	-2.24106	-1.88224	-1.44605
						2006.5	-2.35998	-1.99463	-1.59481
						2007.5	-2.30243	-1.93554	-1.60586
						2008.5	-2.39813	-2.03091	-1.70902
						2009.5	-2.60832	-2.24836	-1.898
						2010.5	-2.58094	-2.21079	-1.88455
						2011.5	-2.65287	-2.28186	-1.98083
						2012.5	-2.82609	-2.45765	-2.06856
						2013.5	-2.91452	-2.54291	-2.12465
						2014.5	-2.94908	-2.57547	-2.12939
						2015.5	-2.98865	-2.60894	-2.1198
						2016.5	-3.21656	-2.83895	-2.25366
						2017.5	-3.42127	-3.04485	-2.28513
						2018.5	-3.72814	-3.34432	-2.57863

## Sheet: Figure 2_a_b_c
Watson et al, "Revised estimates of ocean-atmosphere CO2 flux are consistent with ocean carbon inventory", in press, Nature Comms.
			The FFN-SOM method, highlighted in yellow, is referred to as the "standard" method
			Figure 2 (a) global ocean atmosphere CO2 fluxes by nine methods, PgC yr-1										Figure 2b northern hemisphere CO2 ocean-atmosphere fluxes by nine methods PgC yr-1											Fig 2b, southern hemisphere CO2 ocean-atmosphere fluxes by nine methods, PgC yr-1
			Method											Method											Method
		time	TS-lat	TS-FM	TS-SOM	MLR-lat	MLR-FM	MLR-SOM	FFN-lat	FFN-FM	FFN-SOM		time	TS-lat	TS-FM	TS-SOM	MLR-lat	MLR-FM	MLR-SOM	FFN-lat	FFN-FM	FFN-SOM		time	TS-lat	TS-FM	TS-SOM	MLR-lat	MLR-FM	MLR-SOM	FFN-lat	FFN-FM	FFN-SOM
		1992.5	-2.3419	-1.4548	-2.0193	-1.4731	-1.8376	-1.519	-2.93	-2.3675	-2.2773		1992.5	-0.7373	-0.9457	-0.9049	-0.595	-0.6126	-0.717	-0.8725	-0.8921	-0.9096		1992.5	-1.6045	-0.5091	-1.1143	-0.8781	-1.225	-0.802	-2.0575	-1.4754	-1.3677
		1993.5	-2.1947	-1.3887	-1.8775	-1.5605	-1.8849	-1.593	-2.7174	-2.2728	-2.1501		1993.5	-0.708	-0.9319	-0.8727	-0.6714	-0.6756	-0.7658	-0.9156	-0.9666	-0.9295		1993.5	-1.4867	-0.4567	-1.0047	-0.8891	-1.2094	-0.8273	-1.8017	-1.3062	-1.2205
		1994.5	-2.1602	-1.3815	-1.8258	-1.6342	-1.9108	-1.6115	-2.334	-1.977	-1.9808		1994.5	-0.7066	-0.9053	-0.8393	-0.7255	-0.6701	-0.7692	-0.7788	-0.889	-0.8621		1994.5	-1.4535	-0.4762	-0.9865	-0.9087	-1.2407	-0.8423	-1.5552	-1.0879	-1.1187
		1995.5	-2.1414	-1.4347	-1.8381	-1.5674	-1.8667	-1.6075	-2.2255	-2.0144	-1.899		1995.5	-0.6967	-0.8882	-0.851	-0.7111	-0.6748	-0.7656	-0.8444	-0.9136	-0.8354		1995.5	-1.4447	-0.5465	-0.9871	-0.8563	-1.1919	-0.8419	-1.3811	-1.1008	-1.0635
		1996.5	-2.1481	-1.4386	-1.8071	-1.6762	-1.9421	-1.663	-2.0803	-2.0005	-1.841		1996.5	-0.7408	-0.9057	-0.8579	-0.7632	-0.7124	-0.8021	-0.8666	-0.9146	-0.7999		1996.5	-1.4073	-0.5329	-0.9492	-0.913	-1.2297	-0.8609	-1.2137	-1.0859	-1.041
		1997.5	-2.0521	-1.3829	-1.6944	-1.849	-2.0886	-1.8486	-2.2544	-2.1289	-2.0493		1997.5	-0.7116	-0.8838	-0.8257	-0.8114	-0.7555	-0.8395	-0.925	-0.9477	-0.8536		1997.5	-1.3404	-0.499	-0.8687	-1.0377	-1.3331	-1.009	-1.3294	-1.1811	-1.1956
		1998.5	-2.2633	-1.6665	-1.965	-1.7645	-2.1209	-1.9229	-2.1757	-2.1043	-1.9956		1998.5	-0.7827	-0.9577	-0.9036	-0.7524	-0.7479	-0.8633	-0.903	-0.957	-0.7924		1998.5	-1.4806	-0.7087	-1.0615	-1.0121	-1.373	-1.0596	-1.2727	-1.1473	-1.2032
		1999.5	-2.3213	-1.7858	-1.9822	-1.6079	-1.9767	-1.8178	-1.8772	-1.8009	-1.7544		1999.5	-0.8154	-0.9677	-0.8993	-0.7135	-0.6805	-0.8334	-0.8242	-0.8762	-0.7608		1999.5	-1.5059	-0.8181	-1.0828	-0.8944	-1.2962	-0.9844	-1.0531	-0.9247	-0.9936
		2000.5	-2.2046	-1.7609	-1.8856	-1.6886	-1.9965	-1.8835	-1.8674	-1.7713	-1.7844		2000.5	-0.7765	-0.9413	-0.8711	-0.7595	-0.6987	-0.8467	-0.8146	-0.8372	-0.7726		2000.5	-1.4281	-0.8196	-1.0145	-0.929	-1.2978	-1.0368	-1.0529	-0.9341	-1.0118
		2001.5	-2.0907	-1.6861	-1.7847	-1.8109	-2.0529	-1.8965	-1.6035	-1.5922	-1.6603		2001.5	-0.7738	-0.9313	-0.8694	-0.8663	-0.7766	-0.8868	-0.8052	-0.8567	-0.7576		2001.5	-1.3169	-0.7548	-0.9153	-0.9446	-1.2763	-1.0097	-0.7984	-0.7355	-0.9027
		2002.5	-2.198	-1.9066	-1.9435	-2.1099	-2.3378	-2.1482	-1.9354	-1.9673	-1.9348		2002.5	-0.7964	-0.9709	-0.9177	-0.9643	-0.8829	-0.9759	-0.9377	-1.0147	-0.9271		2002.5	-1.4016	-0.9357	-1.0258	-1.1456	-1.455	-1.1723	-0.9976	-0.9526	-1.0077
		2003.5	-2.3517	-2.0725	-2.0781	-2.237	-2.3963	-2.1958	-2.2074	-2.2497	-2.0296		2003.5	-0.8848	-1.0392	-0.9712	-1.0255	-0.9117	-0.9884	-0.9093	-1.0084	-0.9617		2003.5	-1.4669	-1.0333	-1.1068	-1.2114	-1.4846	-1.2074	-1.2981	-1.2412	-1.068
		2004.5	-2.3634	-2.1356	-2.0516	-2.2478	-2.402	-2.2269	-2.3057	-2.3244	-2.1412		2004.5	-0.9048	-1.0348	-0.9609	-1.0632	-0.9134	-1.0023	-0.9254	-1.035	-1.0043		2004.5	-1.4586	-1.1009	-1.0908	-1.1846	-1.4886	-1.2246	-1.3803	-1.2894	-1.137
		2005.5	-2.4077	-2.2685	-2.1353	-2.2217	-2.4181	-2.28	-2.289	-2.4309	-2.2642		2005.5	-0.9152	-1.0574	-0.9913	-1.0342	-0.9113	-1.0226	-0.9821	-1.1051	-1.0739		2005.5	-1.4924	-1.2111	-1.144	-1.1876	-1.5068	-1.2574	-1.3068	-1.3257	-1.1903
		2006.5	-2.5233	-2.4404	-2.2516	-2.3274	-2.5421	-2.409	-2.4049	-2.4751	-2.3965		2006.5	-1.0207	-1.1489	-1.0711	-1.1108	-0.975	-1.0734	-1.0487	-1.1618	-1.1456		2006.5	-1.5026	-1.2914	-1.1805	-1.2166	-1.5672	-1.3356	-1.3562	-1.3133	-1.2509
		2007.5	-2.5041	-2.5306	-2.268	-2.2744	-2.5041	-2.4399	-2.3059	-2.3906	-2.3357		2007.5	-0.9786	-1.1138	-1.04	-1.0765	-0.9483	-1.0713	-1.0364	-1.1213	-1.1002		2007.5	-1.5255	-1.4168	-1.228	-1.1979	-1.5557	-1.3686	-1.2694	-1.2694	-1.2355
		2008.5	-2.5623	-2.6215	-2.3052	-2.2414	-2.4919	-2.4733	-2.3459	-2.3781	-2.4038		2008.5	-1.0114	-1.1242	-1.0451	-1.0503	-0.9416	-1.0771	-1.0187	-1.071	-1.1087		2008.5	-1.5509	-1.4973	-1.2601	-1.1912	-1.5503	-1.3963	-1.3273	-1.3071	-1.2951
		2009.5	-2.527	-2.6557	-2.2737	-2.4525	-2.5434	-2.5639	-2.5591	-2.6536	-2.6279		2009.5	-1.0054	-1.1271	-1.0293	-1.1608	-0.9512	-1.0963	-1.107	-1.1751	-1.1914		2009.5	-1.5216	-1.5286	-1.2444	-1.2917	-1.5922	-1.4676	-1.4521	-1.4785	-1.4365
		2010.5	-2.5408	-2.7436	-2.3181	-2.3229	-2.5232	-2.5176	-2.5506	-2.5537	-2.6213		2010.5	-1.0619	-1.1518	-1.0797	-1.167	-0.9876	-1.1127	-1.1025	-1.1884	-1.1892		2010.5	-1.479	-1.5918	-1.2384	-1.1559	-1.5356	-1.4049	-1.4482	-1.3653	-1.4322
		2011.5	-2.6494	-2.8989	-2.3856	-2.3148	-2.5599	-2.6061	-2.6892	-2.5415	-2.6797		2011.5	-1.1184	-1.2008	-1.1161	-1.1665	-0.9766	-1.1435	-1.0968	-1.1854	-1.1705		2011.5	-1.5309	-1.698	-1.2695	-1.1483	-1.5833	-1.4626	-1.5923	-1.356	-1.5093
		2012.5	-2.6436	-2.9252	-2.417	-2.4598	-2.5783	-2.6704	-2.687	-2.7065	-2.8293		2012.5	-1.1082	-1.1831	-1.1085	-1.1625	-0.9873	-1.1416	-1.0846	-1.1341	-1.1402		2012.5	-1.5353	-1.7421	-1.3085	-1.2972	-1.591	-1.5289	-1.6024	-1.5724	-1.6891
		2013.5	-2.836	-3.2127	-2.6239	-2.5549	-2.5952	-2.7391	-2.6995	-2.7291	-2.9108		2013.5	-1.1874	-1.2789	-1.1848	-1.2368	-0.9958	-1.1678	-1.074	-1.1008	-1.1265		2013.5	-1.6485	-1.9338	-1.4391	-1.3181	-1.5994	-1.5713	-1.6255	-1.6283	-1.7843
		2014.5	-2.8722	-3.3264	-2.6546	-2.6392	-2.6714	-2.7955	-2.7613	-2.8494	-2.9306		2014.5	-1.2115	-1.3061	-1.1998	-1.3265	-1.0424	-1.1996	-1.124	-1.1644	-1.1465		2014.5	-1.6607	-2.0203	-1.4548	-1.3128	-1.6289	-1.5959	-1.6373	-1.685	-1.784
		2015.5	-3.0002	-3.5192	-2.8226	-2.7599	-2.6872	-2.9469	-2.7229	-2.9413	-2.9391		2015.5	-1.2898	-1.4028	-1.2894	-1.4162	-1.0733	-1.2612	-1.1506	-1.1943	-1.1615		2015.5	-1.7104	-2.1164	-1.5332	-1.3437	-1.6139	-1.6857	-1.5723	-1.747	-1.7776
		2016.5	-3.3453	-3.8656	-3.1673	-2.9274	-2.793	-3.0464	-2.9285	-3.0688	-3.1652		2016.5	-1.4174	-1.5035	-1.3955	-1.4666	-1.0918	-1.2824	-1.2044	-1.2862	-1.2656		2016.5	-1.9279	-2.3621	-1.7718	-1.4608	-1.7012	-1.7641	-1.724	-1.7826	-1.8996
		2017.5	-3.3807	-3.9726	-3.191	-3.037	-2.941	-3.0511	-3.0091	-3.4479	-3.36		2017.5	-1.4329	-1.4941	-1.4018	-1.4909	-1.1279	-1.2874	-1.2469	-1.3516	-1.3374		2017.5	-1.9478	-2.4785	-1.7892	-1.5461	-1.813	-1.7638	-1.7622	-2.0963	-2.0226
		2018.5	-3.5319	-4.2308	-3.344	-3.167	-3.0537	-3.1376	-3.3884	-3.9584	-3.6287		2018.5	-1.5175	-1.5872	-1.4784	-1.5897	-1.1868	-1.3622	-1.4286	-1.4359	-1.5203		2018.5	-2.0144	-2.6436	-1.8656	-1.5773	-1.8669	-1.7753	-1.9598	-2.5225	-2.1084

## Sheet: Figure 3
Watson et al, "Revised estimates of ocean-atmosphere CO2 flux are consistent with ocean carbon inventory", in press, Nature Comms.
								The immediate source for the "earlier estimates" is the Excel file containing the Global Carbon Project budget for 2018:
								https://data.icos-cp.eu/licence_accept?ids=%5B%22OT_YY6iORypk2yAcwjMpUQpo%22%5D
				Figure 3 line plots
				This work (surface flux increased by -0.57 PgC yr-1)				Earlier estimates
					Anthopogenic carbon uptake through surface Pg Cyr-1	1-sigma standard deviation		time	Landschutzer et al *	Rodenbeck et al**
				1992.5	-2.80937	0.521912		1992	-1.98	-2.78
				1993.5	-2.67365	0.438573		1993	-1.99	-2.48
				1994.5	-2.47817	0.318331		1994	-1.89	-1.96
				1995.5	-2.40651	0.292059		1995	-1.7	-1.94
				1996.5	-2.33848	0.254568		1996	-1.59	-1.83
				1997.5	-2.57496	0.295729		1997	-1.79	-2.08
				1998.5	-2.529	0.231144		1998	-1.58	-2.43
				1999.5	-2.26473	0.230735		1999	-1.33	-2.02
				2000.5	-2.29264	0.192159		2000	-1.33	-1.78
				2001.5	-2.16689	0.213962		2001	-1.34	-1.41
				2002.5	-2.45203	0.194698		2002	-1.6	-2.28
				2003.5	-2.53286	0.178142		2003	-1.83	-2.49
				2004.5	-2.64207	0.176321		2004	-1.87	-2.55
				2005.5	-2.76287	0.170061		2005	-2	-2.26
				2006.5	-2.91292	0.171957		2006	-2.13	-2.22
				2007.5	-2.84534	0.176169		2007	-2.17	-2.02
				2008.5	-2.92215	0.19105		2008	-2.25	-2.03
				2009.5	-3.15147	0.197587		2009	-2.43	-2.44
				2010.5	-3.13806	0.205961		2010	-2.39	-2.6
				2011.5	-3.2064	0.235436		2011	-2.48	-2.59
				2012.5	-3.35881	0.232821		2012	-2.56	-2.61
				2013.5	-3.44436	0.26531		2013	-2.41	-2.82
				2014.5	-3.4741	0.273449		2014	-2.42	-3
				2015.5	-3.48609	0.303685		2015	-2.57	-2.52
				2016.5	-3.73091	0.366109		2016	-2.63	-3.09
				2017.5	-3.94488	0.377733		2017	-2.65	-2.69
				2018.5	-4.24221	0.447139
									* increased by -0.57 PgC yr-1 to account for pre-industrial and Arctic fluxes
									** increased by -0.45 PgC yr-1 to account for pre-industrial fluxes.
